# Supplementary material for: Complementary Feeding Practices and Associated Factors for Infants Attending Hawasa University Comprehensive Specialized Hospital, Sidama Region, Southern Ethiopia
Source: Research Square preprint supplement (doi:10.21203/rs.3.rs-4243183/v1), 2024-04-24
Supplement: Supplementary file 1 [file 193b224cd67efa66d6b03503.docx]

**Table 1 Socio-demographic characteristics of the study population (n=388)**

| Socio-demographic characteristics | Sample (n) Percent | |
| --- | --- | --- |
| Maternal age (years):n= 395 | 395 |  |
| <18 |  | 3.3 |
| 18-24 |  |  |
| 25-35 |  |  |
| >35 |  |  |
| Infant’s age (months) | 395 |  |
| 6 |  | 8.4 |
| 6-8.9 |  |  |
| 9-12 |  | 27 |
| >12 |  | 32 |
| First infant or not | 395 |  |
| Yes | 155 | 39.2 |
| No | 240 | 60.8 |
| Age of older infant (years) | 240 |  |
| <2 | 17 | 7 |
| >2 | 223 | 93 |
| Sex of infant | 395 |  |
| Male | 229 | 58 |
| Female | 166 | 42 |
| Marital status | 395 |  |
| Single |  | 0.5 |
| Married |  | 97.7 |
| Widowed |  | 0.75 |
| Divorced |  | 1 |
| Mother’s educational status | 395 |  |
| Not educated | 102 | 25.8 |
| Adult education | 8 | 2 |
| Grade 1-4 | 83 | 21 |
| Grade 5-8 | 79 | 20 |
| Grade 9-10 | 83 | 21 |
| Grade 11-12 | 14 | 3.6 |
| College level education | 26 | 6.6 |
| Religion | 395 |  |
| Protestant | 161 | 40.7 |
| Muslim |  | 52.2 |
| Orthodox | 13 | 3.3 |
| Catholic | 7 | 1.8 |
| Others | 8 | 2.0 |
| Ethnicity | 395 |  |
| Sidama | 139 | 35.2 |
| Oromo | 214 | 54.2 |
| Amhara | 13 | 3.2 |
| Wolaita | 19 | 4.8 |
| Gurage | 5 | 1.3 |
| Other | 5 | 1.3 |
